# Supplementary material for: Hydroxychloroquine: mechanism of action inhibiting SARS-CoV2 entry
Source: PubMed Central journal article supplement — bioRxiv. 2020 Oct 30:2020.08.13.250217. Originally published 2020 Aug 14. Preprint. [Version 2] doi: 10.1101/2020.08.13.250217 (PMC7430563; doi:10.1101/2020.08.13.250217), 2020-10-30
Supplement: NIHPP2020.08.13.250217-supplement-1.pdf [file NIHPP2020.08.13.250217-supplement-1.pdf]

## Supplemental Figures

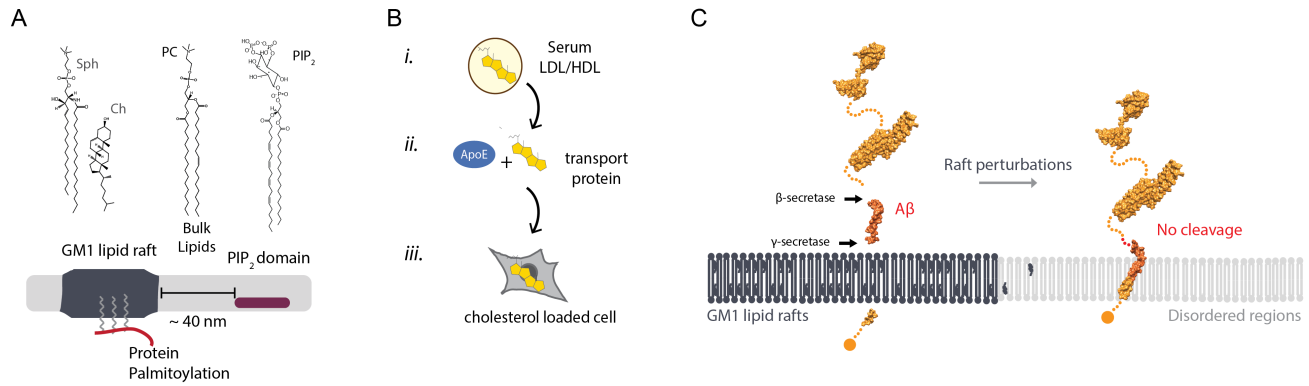

**Fig. S1. Membrane heterogeneity.** (A) GM1 rafts are clusters of saturated lipids known as liquid ordered ( $L_o$ ) and commonly reside separate from liquid disordered ( $L_d$ ) phases<sup>46</sup>. The ordered phase ( $L_o$ ) is generally enriched in sphingomyelin and cholesterol whereas the disordered ( $L_d$ ) phase consists of unsaturated lipids and includes polyunsaturated lipids like PA and PIP<sub>2</sub><sup>48</sup>. (B) Cartoon diagram showing the experimental setup for loading cultured cells with cholesterol. *i.*, Cholesterol (yellow shading) loaded into lipoprotein (e.g., low- and high-density lipoprotein (LDL and HDL respectively)) from blood serum. *ii.*, Cholesterol free human apolipoprotein E (apoE, brown shading), a cholesterol transport protein, is exposed to cholesterol from blood serum and *iii.*, ApoE transports cholesterol into of cells (grey shading). (C) Model of HCQ and anesthetics translocating APP from GM1 rafts to disordered regions through raft perturbation to reduce the synthesis of A $\beta$ .

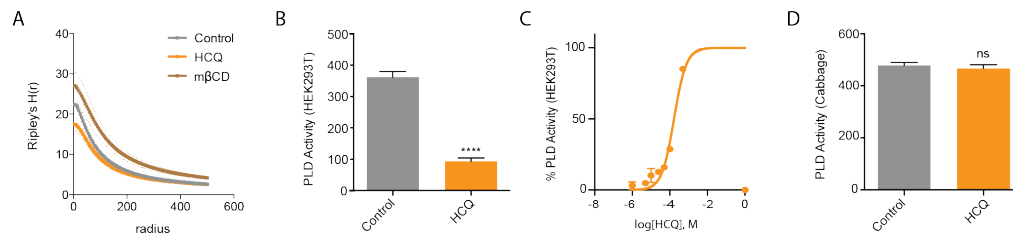

**Fig. S2. HCQ displacement of PLD2 from lipid rafts. (A)** Ripley's H-Function (H(r)) showing raft separation. **(B)** HCQ (50 $\mu$ M) decreased PLD activity in PLD assay. Data are expressed as mean  $\pm$  s.e.m., \*\*\*\*P  $\leq$  0.0001, unpaired t test, n=6. **(C)** A dose response of HCQ's inhibition to PLD activity in PLD assay, n=3. **(D)** Effect of HCQ(50 $\mu$ M) on PLD activity in cabbage PLD assay is not significant, unpaired t test, n=4-5.

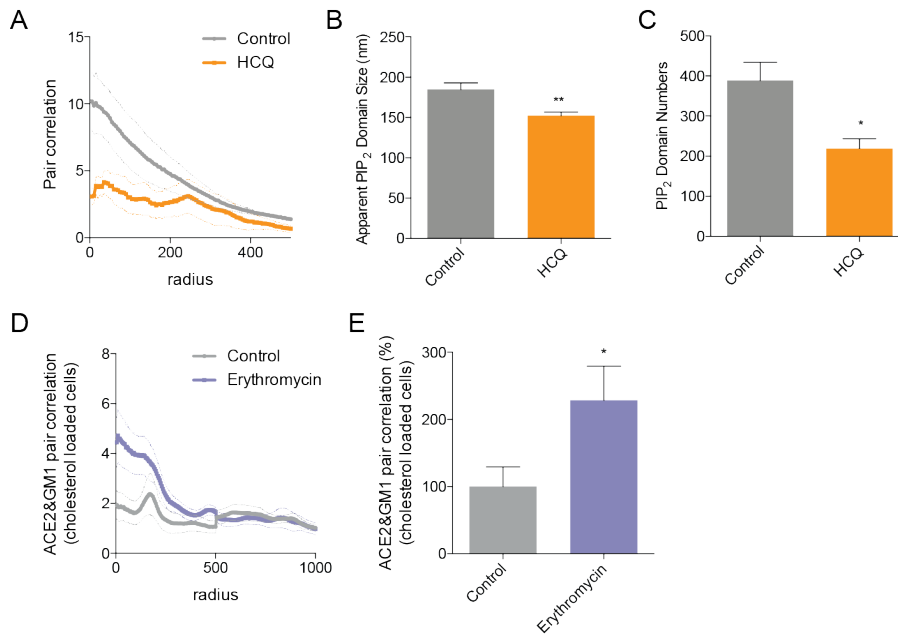

**Fig. S3. dSTORM of PIP<sub>2</sub> domains.** (A) Cross pair correlation analysis of dSTORM imaging (Fig. 3C). HCQ treatment decreased association of ACE2 and PIP<sub>2</sub>. (B-C) Bar graph of the apparent raft diameter analyzed by DBSCAN cluster analysis. HCQ decreases both raft diameter (B) and number (C) of PIP<sub>2</sub> domains. Data are expressed as mean  $\pm$  s.e.m., \* $P \leq 0.05$ , \*\* $P \leq 0.01$ , one-way ANOVA,  $n=5-6$ . (D-E) Cross pair correlation (D) and percent of cross pair correlation calculated at short distances (0-5 nm) (E) of dSTORM imaging. Erythromycin treatment decreased association of ACE2 with GM1 rafts. Data are expressed as mean  $\pm$  s.e.m., \* $P \leq 0.05$ , \*\* $P \leq 0.01$ , unpaired t test,  $n=10$ .
